# Supplementary material
Source: publisher figshare collection journal article supplement (https://acs.figshare.com/ndownloader/files/4620196)
Supplement: Supplementary file 1 [file 4620196]

## Local structure of CPO-27-Ni Metallorganic Framework upon dehydration and coordination of NO

Francesca Bonino,<sup>a</sup> Sachin Chavan,<sup>a</sup> Jenny G. Vitillo,<sup>a</sup> Elena Groppo,<sup>a</sup> Giovanni Agostini,<sup>a</sup> Carlo Lamberti,<sup>a</sup> Pascal D. C. Dietzel,<sup>b</sup> Carmelo Prestipino<sup>c</sup> and Silvia Bordiga,<sup>a\*</sup>

<sup>a</sup> Department of Inorganic, Physical and Materials Chemistry and NIS Centre of Excellence,  
Università di Torino, Via P. Giuria 7, 10125 Torino, Italy and INSTM Centro di Riferimento

<sup>b</sup>SINTEF Materials and Chemistry, Postboks 124, Blindern, N-0314, Oslo, Norway, Centre for  
Materials Science and Nanotechnology, Department of Chemistry, University of Oslo, Postboks  
1033, Blindern, N-0315, Oslo, Norway

<sup>c</sup>ESRF, 6 rue Jules Horowitz, BP220, F-38043, Grenoble CEDEX, France

---

\*Corresponding author: Silvia Bordiga: [silvia.bordiga@unito.it](mailto:silvia.bordiga@unito.it). Tel. +390116707140 Fax +39011670 7855

### CPO-27-Ni: Electrostatic potential map.

Internal surfaces of CPO-27-Ni are characterized in large extent by a positive surface with the exception of the  $\text{O}_{\text{OHs}}$  and the  $\text{O}_{\text{Cu}}$  closeness as documented by the electrostatic potential map depicted in Figure S1. The electrostatic potential map has been obtained on periodic single-point calculations done at the BLYP/DN level (GGA functional) with the DMol<sup>3</sup> program (as embedded in Materials Studio 4.0, Accelrys Inc.)<sup>1, 2</sup> on the unit cell of CPO-27-Ni as obtained in literature from XRD refinement of its structure.<sup>3</sup>

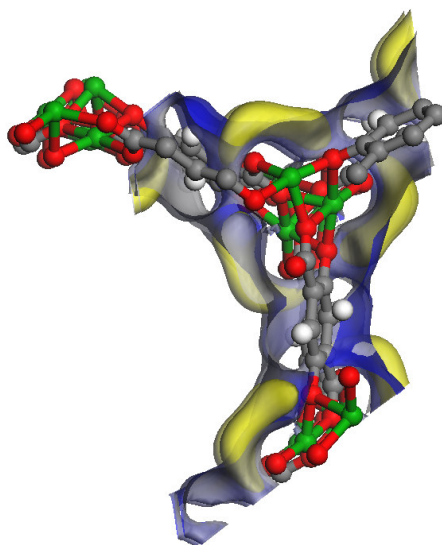

**Figure S1.** Portion of the tridimensional structure of CPO-27-Ni, representing the  $\text{Ni}^{2+}$  first coordination sphere and the electrostatic potential map: isosurfaces at -0.015 and +0.015 a.u. (atomic units) are reported in yellow and blue, respectively. View orthogonal to the honeycomb channel

### Electronic spectroscopies: Photoluminescence.

Comparison between the photoluminescence of CPO-27-Ni and the H<sub>4</sub>dhtp linker. The linker is significantly more fluorescent than the MOF. The absence of a double emission peak for the linker excited at 350 nm implies that the emission peak observed for CPO-27-Ni at 565 nm can be assigned to a charge transfer from the ligand to the metal (LMCT).

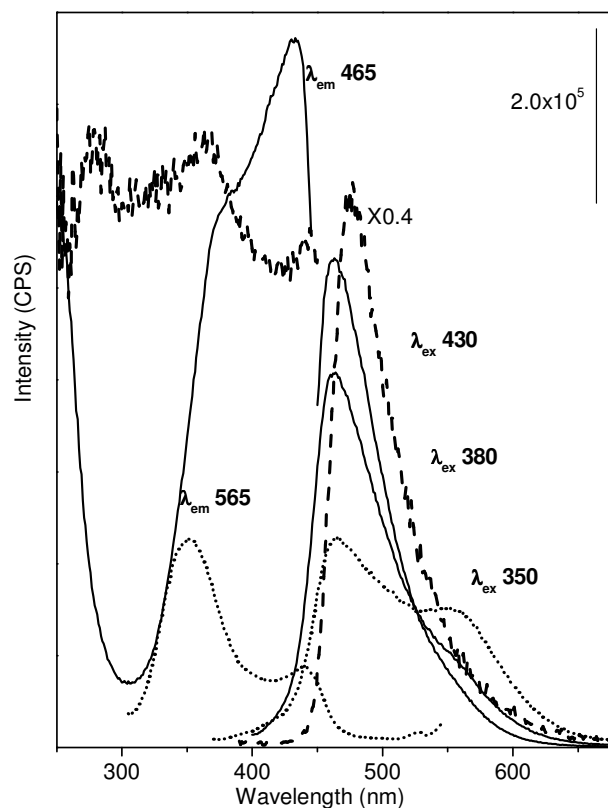

**Figure S2.** Comparison between photoluminescence spectra of as synthesized CPO-27-Ni and H<sub>4</sub>dhtp ligand (dashed line). Solid and dotted curves are used to identify corresponding excitation and emission spectra of CPO-27-Ni.

### Interaction with NO: IR data

NO dosed on a CPO-27-Ni pellet gives rise to a very strong band centered at  $1840\text{ cm}^{-1}$  (due to the formation of  $\nu(\text{NO})$  of  $\text{Ni}(\text{II})\cdots\text{NO}$  adduct) that easily becomes so intense to go out of scale. Part a) of Figure S3 reports the set of spectra obtained till to reach the equilibrium pressure of 1 mbar. Part b) of Figure S3 reports the set of spectra collected along a prolonged outgassing in dynamic vacuo. The last spectrum has been obtained after 30 minutes of pumping. It is clear that NO is not completely reversible at room temperature.

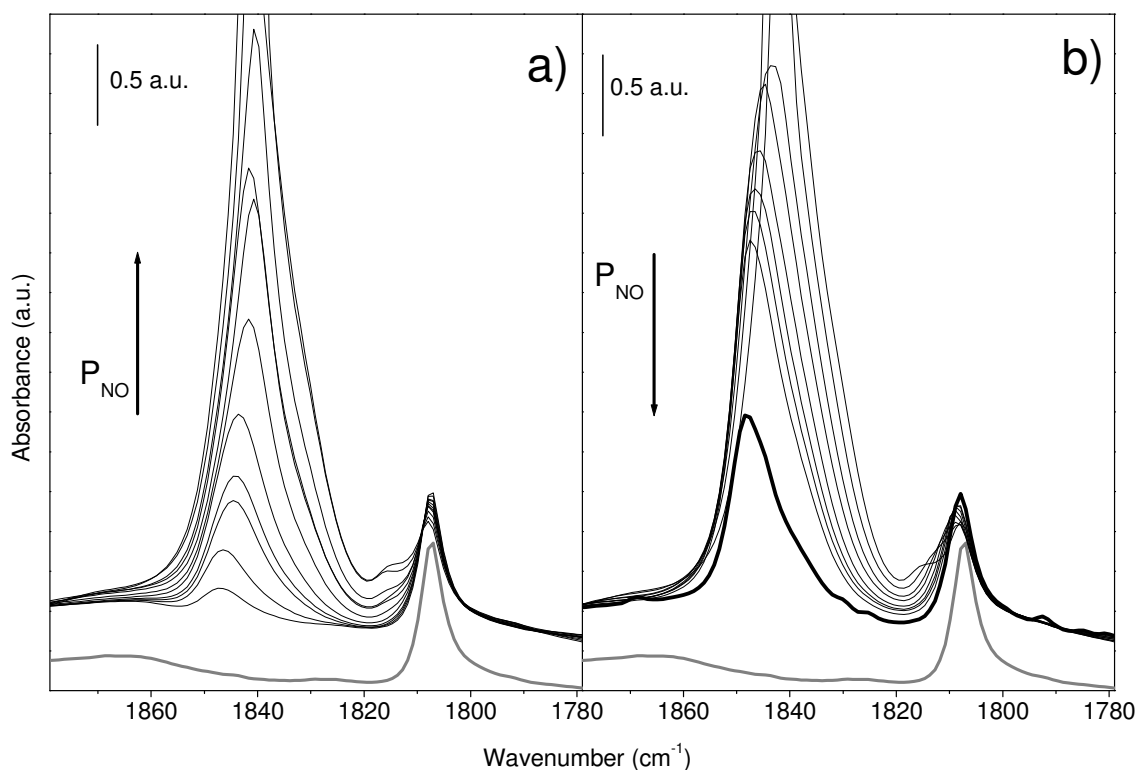

**Figure S3.** Part a): FTIR spectra of increasing NO equilibrium pressures ( $P_{\text{NO}}$ ) dosed at RT on CPO-27-Ni (equilibrium  $p_{\text{max}} = 0.001\text{ Torr}$ ). Part b): spectra obtained upon successive progressive outgassing.

The bold black spectrum refers to a prolonged outgassing at RT down to  $10^{-3}$  Torr. In both frames the bold gray curve, vertically translated for clarity, reports the spectrum collected before NO dosage, showing the framework mode at  $1807\text{ cm}^{-1}$ .

## References

1. *Materials Studio Modeling 4.0*, Accelrys Software Inc.: San Diego, CA, 2005.
2. Delley, B., *J. Chem. Phys.* **1990**, 92, 508-517.
3. Dietzel, P. D. C.; Panella, B.; Hirscher, M.; Blom, R.; Fjellvag, H., *Chem. Commun.* **2006**, 959-961.
